# Supplementary material
Source: HighWire-hosted journal article supplement (https://bmjopen.bmj.com/content/7/8/e016887)
Supplement: inline-supplementary-material-1 [file inline-supplementary-material-1.pdf]

## **Appendix i: Topic guide – Liver health professionals**

### **Current experience of providing care to patients**

What are the key issues or main challenges of caring for this patient group (in the last year of life) from your perspective?

### **Understanding of patient and family problems**

What do you think are some of the problems or difficulties that patients with end stage liver disease face? What about their relatives?

### **Perception of patient and family understanding of liver disease diagnosis**

What are your perceptions of patients' understanding of their own liver disease?

What is your perception of families understanding?

### **Discussion of prognosis and future preference of care**

How do you address the issue of prognosis with patients? And when do you do it?

When do you address the issue of prognosis with the family?

How do you address patients' wishes for future care if. When do you think this is appropriate?

Would you document discussions about prognosis with the GP and patients future preferences for care?

### **Issues related to supportive and palliative care**

How do you manage exacerbations of liver disease?

When do you refer to palliative care?

How do you identify when someone is actively dying?

What should good quality care for patients with ESLD look like?
